# Supplementary material
Source: ML conference proceedings conference paper supplement (https://www.ecva.net/papers/eccv_2020/papers_ECCV/html/123670358_ECCV_2020_paper.php)
Supplement: Supplementary file 2 [file 123670358-supp.zip]

Archive with 2 entries (2 files):
- CLAWS Net Supplementary.pdf
- CLAWS Net UCF-Crime Results.mp4
